# Supplementary material
Source: HighWire-hosted journal article supplement (https://www.cmajopen.ca/highwire/filestream/81203/field_highwire_adjunct_files/3/original-submission.pdf)
Supplement: original-submission.pdf [file original-submission.pdf]

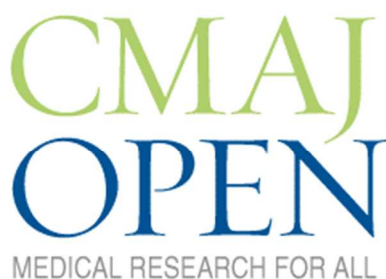

## The Canadian Preterm Birth Network: a study protocol for improving outcomes for preterm infants and their families

|                               |                                                                                                                                                                                                                                                                                                                                                                                                                                                                                                                                                                                                                                                                                                                                                                                                                                                                                                                                                                                                                                            |
|-------------------------------|--------------------------------------------------------------------------------------------------------------------------------------------------------------------------------------------------------------------------------------------------------------------------------------------------------------------------------------------------------------------------------------------------------------------------------------------------------------------------------------------------------------------------------------------------------------------------------------------------------------------------------------------------------------------------------------------------------------------------------------------------------------------------------------------------------------------------------------------------------------------------------------------------------------------------------------------------------------------------------------------------------------------------------------------|
| Journal:                      | <i>CMAJ Open</i>                                                                                                                                                                                                                                                                                                                                                                                                                                                                                                                                                                                                                                                                                                                                                                                                                                                                                                                                                                                                                           |
| Manuscript ID                 | CMAJOpen-2017-0128                                                                                                                                                                                                                                                                                                                                                                                                                                                                                                                                                                                                                                                                                                                                                                                                                                                                                                                                                                                                                         |
| Manuscript Type:              | Protocol                                                                                                                                                                                                                                                                                                                                                                                                                                                                                                                                                                                                                                                                                                                                                                                                                                                                                                                                                                                                                                   |
| Date Submitted by the Author: | 02-Oct-2017                                                                                                                                                                                                                                                                                                                                                                                                                                                                                                                                                                                                                                                                                                                                                                                                                                                                                                                                                                                                                                |
| Complete List of Authors:     | <p>Shah, Prakesh; Mount Sinai Hospital, Paediatrics<br/>         McDonald, Sarah; McMaster University, Obstetrics and Gynecology<br/>         Barrett, Jon; Sunnybrook HSC, OBGYN<br/>         Synnes, Anne; Children's and Women's Health Centre of BC, Neonatology<br/>         Robson, Kate; Canadian Premature Babies Foundation<br/>         Foster, Jonathan<br/>         Pasquier, Jean-Charles; Sherbrooke University Hospital Centre, Department of Gynecology - Obstetrics<br/>         Joseph, K.S.; University of British Columbia, Obstetrics and Gynecology<br/>         Piedboeuf, Bruno; Universite Laval, Paediatrics<br/>         Lacaze-Masmonteil, Thierry; Foothills Medical Centre<br/>         O'Brien, Karel; Mount Sinai Hospital, Pediatrics<br/>         Shivananda, Sandesh; BC Children's and Women's Health Centre, Neonatology<br/>         Chaillet, N; CHU Sainte-Justine, Obstetrics and Gynecology<br/>         Pechivanoglou, Petros; Hospital for Sick Children, Child Health Evaluative Sciences</p> |
| Keywords:                     | Neonatology, Pediatrics                                                                                                                                                                                                                                                                                                                                                                                                                                                                                                                                                                                                                                                                                                                                                                                                                                                                                                                                                                                                                    |
| More Detailed Keywords:       | preterm birth, maternal-fetal medicine, perinatology, quality improvement                                                                                                                                                                                                                                                                                                                                                                                                                                                                                                                                                                                                                                                                                                                                                                                                                                                                                                                                                                  |
| Abstract:                     | <p>Background: Preterm birth (PTB), birth before 37 weeks of gestation, occurs in ~8% of pregnancies in Canada. It is associated with high mortality and morbidity rates that significantly impact families and the healthcare system. Our overall goal is to create a transdisciplinary platform, the Canadian Preterm Birth (PTB) Network, where investigators, stakeholders, and families will work together to improve childhood outcomes of preterm neonates.</p> <p>Methods: Our national cohort will include 24 maternal-fetal/obstetrical</p>                                                                                                                                                                                                                                                                                                                                                                                                                                                                                      |

1  
2  
3  
4  
5  
6  
7  
8  
9  
10  
11  
12  
13  
14  
15  
16  
17  
18  
19  
20  
21  
22  
23  
24  
25  
26  
27  
28  
29  
30  
31  
32  
33  
34  
35  
36  
37  
38  
39  
40  
41  
42  
43  
44  
45  
46  
47  
48  
49  
50  
51  
52  
53  
54  
55  
56  
57  
58  
59  
60

|  |                                                                                                                                                                                                                                                                                                                                                                                                                                                                                                                                                                                                                                                                                                                                                                                                                                                                                                                                                                                                                                                                                                                                                                                                                                                                                                                                                                 |
|--|-----------------------------------------------------------------------------------------------------------------------------------------------------------------------------------------------------------------------------------------------------------------------------------------------------------------------------------------------------------------------------------------------------------------------------------------------------------------------------------------------------------------------------------------------------------------------------------------------------------------------------------------------------------------------------------------------------------------------------------------------------------------------------------------------------------------------------------------------------------------------------------------------------------------------------------------------------------------------------------------------------------------------------------------------------------------------------------------------------------------------------------------------------------------------------------------------------------------------------------------------------------------------------------------------------------------------------------------------------------------|
|  | <p>units, 31 neonatal intensive care units and 26 neonatal follow-up programs across Canada with planned linkages to provincial health information systems. Three broad clusters of projects will be undertaken. Cluster 1 will focus on quality improvement efforts that use the Evidence-based Practice for Improving Quality methodology to evaluate information from the PTB Network database and review the current literature then identify potentially better health care practices and implement identified strategies. Cluster 2 will assess the impact of current practices and practice changes in maternal, perinatal, and neonatal care on maternal, neonatal and neurodevelopmental outcomes. Cluster 3 will evaluate the impact of PTB on families and health care systems by integrating PTB Network data, parent feedback and national and provincial database information in order to identify areas where more parental support is needed, and also generate robust estimates of resource utilization, cost and cost effectiveness around preterm neonate care.</p> <p>Interpretation: These collaborative efforts will create a flexible, transdisciplinary, evaluable, and informative research and quality improvement platform that supports programs, projects, and partnerships focused on improving outcomes of preterm neonates.</p> |
|  |                                                                                                                                                                                                                                                                                                                                                                                                                                                                                                                                                                                                                                                                                                                                                                                                                                                                                                                                                                                                                                                                                                                                                                                                                                                                                                                                                                 |

SCHOLARONE™  
Manuscripts

Confidential

1  
2  
3 **The Canadian Preterm Birth Network: a study protocol for improving outcomes for**  
4 **preterm infants and their families**  
5  
6

7  
8 Prakesh S Shah, MD, MSc<sup>1,2</sup>; Sarah D McDonald, MD, MSc<sup>3</sup>; Jon Barrett, MD<sup>4</sup>; Anne Synnes,  
9 MDCM, MHSc<sup>5</sup>; Kate Robson<sup>6,7</sup>; Jonathan Foster<sup>6</sup>; Jean-Charles Pasquier, MD, PhD<sup>8</sup>; K S  
10 Joseph, MD, PhD<sup>9</sup>; Bruno Piedboeuf, MD<sup>10</sup>; Thierry Lacaze-Masmonteil, MD, PhD<sup>11</sup>; Karel  
11 O'Brien, MD<sup>1,2</sup>; Sandesh Shivananda, MD, MSc<sup>5</sup>; Nils Chaillet, PhD<sup>12</sup>; Petros Pechlivanoglou,  
12 PhD<sup>13</sup>; on behalf of the Canadian Preterm Birth Network Investigators\*

13  
14  
15  
16  
17  
18  
19  
20  
21 **Affiliations:** <sup>1</sup>Department of Paediatrics, Mount Sinai Hospital, Toronto, ON, Canada;  
22  
23 <sup>2</sup>Department of Pediatrics, University of Toronto, Toronto, ON, Canada; <sup>3</sup>Departments of  
24  
25 Obstetrics and Gynecology, Radiology, and Research Methods, Evidence & Impact, McMaster  
26  
27 University, Hamilton, ON, Canada; <sup>4</sup>Women and Babies Program, Sunnybrook Health Sciences  
28  
29 Center, Sunnybrook Research Institute, Toronto, ON, Canada; <sup>5</sup>Department of Pediatrics,  
30  
31 University of British Columbia, Vancouver, BC, Canada; <sup>6</sup>Canadian Premature Babies  
32  
33 Foundation, Toronto, ON, Canada; <sup>7</sup>Women and Babies Program, Sunnybrook Health Science  
34  
35 Centre, Toronto, ON, Canada; <sup>8</sup>Department of Obstetrics and Gynecology, Université de  
36  
37 Sherbrooke, Sherbrooke, QC, Canada; <sup>9</sup>Department of Obstetrics and Gynaecology, University  
38  
39 of British Columbia, Vancouver, BC, Canada; <sup>10</sup>Department of Pediatrics, Université Laval,  
40  
41 Quebec City, QC, Canada; <sup>11</sup>Department of Pediatrics, Alberta Health Services and the  
42  
43 Cumming School of Medicine, University of Calgary, Calgary, AB, Canada; <sup>12</sup>Department of  
44  
45 Obstetrics and Gynecology, Université Laval, Quebec City, QC, Canada; <sup>13</sup>Child Health  
46  
47 Evaluative Sciences, The Hospital for Sick Children, Toronto, ON, Canada;  
48  
49  
50  
51  
52  
53  
54  
55  
56  
57  
58  
59  
60

1  
2  
3 **Corresponding author:** Prakesh S Shah, Department of Paediatrics, Mount Sinai Hospital, 19-  
4  
5 231F, 600 University Ave., Toronto, ON, Canada, M5G 1X5; Tel: 416-586-4761; Fax: 416-586-  
6  
7 8745;

8  
9  
10 Email: Prakeshkumar.Shah@sinaihealthsystem.ca  
11  
12  
13  
14

15 **Funding statement:** This work was supported by a Canadian Institutes of Health Research  
16  
17 Team Grant # PBN150642.  
18  
19  
20

21  
22 **Competing interests:** The authors declare no competing interests.  
23  
24

25 **Keywords:** preterm birth, neonatal networks, quality improvement, outcomes, neonatal,  
26  
27 perinatal  
28  
29  
30

31  
32 **Word Count:** Abstract 250; Text 2516  
33  
34

35 **\*Group Information:** A complete listing of Canadian Preterm Birth Network Investigators is  
36  
37 provided in Appendix 2.  
38  
39  
40  
41  
42  
43  
44  
45  
46  
47  
48  
49  
50  
51  
52  
53  
54  
55  
56  
57  
58  
59  
60

## ABSTRACT

*Background:* Preterm birth (PTB), birth before 37 weeks of gestation, occurs in ~8% of pregnancies in Canada. It is associated with high mortality and morbidity rates that significantly impact families and the healthcare system. Our overall goal is to create a transdisciplinary platform, the Canadian Preterm Birth (PTB) Network, where investigators, stakeholders, and families will work together to improve childhood outcomes of preterm neonates.

*Methods:* Our national cohort will include 24 maternal-fetal/obstetrical units, 31 neonatal intensive care units and 26 neonatal follow-up programs across Canada with planned linkages to provincial health information systems. Three broad clusters of projects will be undertaken. Cluster 1 will focus on quality improvement efforts that use the Evidence-based Practice for Improving Quality methodology to evaluate information from the PTB Network database and review the current literature then identify potentially better health care practices and implement identified strategies. Cluster 2 will assess the impact of current practices and practice changes in maternal, perinatal, and neonatal care on maternal, neonatal and neurodevelopmental outcomes. Cluster 3 will evaluate the impact of PTB on families and health care systems by integrating PTB Network data, parent feedback and national and provincial database information in order to identify areas where more parental support is needed, and also generate robust estimates of resource utilization, cost and cost effectiveness around preterm neonate care.

*Interpretation:* These collaborative efforts will create a flexible, transdisciplinary, evaluable, and informative research and quality improvement platform that supports programs, projects, and partnerships focused on improving outcomes of preterm neonates.

## INTRODUCTION

Preterm birth (PTB), defined as birth occurring before 37 weeks gestation, occurs in approximately 8% of pregnancies in Canada,(1) and has a life-long impact on individuals, their families, and society. As the leading cause of infant death, cerebral palsy, and disability, PTB is estimated to cost the Canadian healthcare system over \$8 billion per year.(2) Our previous studies showed that by applying collaborative, integrated quality improvement (QI) via networking, the incidence of major neonatal morbidity such as retinopathy of prematurity, necrotizing enterocolitis and nosocomial infections decreased by 20-50% in preterm infants at <29 weeks' gestational age (GA).(3-5) Outcome improvements to date used our existing platforms, which were limited to neonatal and neonatal follow-up researchers, despite mounting evidence that events before and during pregnancy can have life-long implications for the fetus and child. Furthermore, our platforms were missing data regarding family integration in PTB care, which can also positively affect neonatal outcomes. Thus, the Canadian Preterm Birth (PTB) Network described in this protocol aims to expand and build on our existing neonatal platforms to develop a pan-Canadian network consisting of a transdisciplinary team with expertise in maternal fetal medicine (MFM), obstetrics (OB), neonatology, pediatrics, neonatal follow-up, epidemiology, health economics, and health informatics and also including parents, nurses, other allied healthcare professionals, national/provincial organizations, and policy makers. The primary goal of the PTB Network is to translate knowledge generated by clinical, QI, and health services research into optimal PTB care practices and policies that substantially improve both short and long-term outcomes. In this protocol, we describe the use of this PTB

1  
2  
3 Network to implement and assess QI; evaluate the impact of maternal, neonatal, and  
4 developmental interventions; and generate estimates of the economic impact of PTB.  
5  
6

## 7 **METHODS**

### 8 *Overview*

9  
10 The PTB Network will expand the efforts of the existing neonatal networks affiliated with the  
11 Canadian Neonatal Network (CNN). CNN collects and maintains data from all 31 Level 3  
12 neonatal intensive care units (NICUs) in Canada and is used for benchmarking, collaborative  
13 research, QI, training, and advocacy.(3-8) An internal audit has confirmed that the CNN database  
14 is valid and reliable.(9) Furthermore, robust linkages exist between CNN and its associated  
15 databases: the Canadian Neonatal Follow-Up Network,(10) the Canadian Neonatal Transport  
16 Network, and the Canadian Pediatric Surgery Network.(11) The PTB Network will incorporate  
17 all of these existing networks and expand to include the MFM/OB community within 24 tertiary  
18 perinatal units across Canada (Figure 1). In addition, we plan to develop linkages with the  
19 following databases: BORN Ontario,(12) Nova Scotia Atlee Perinatal,(13) Alberta Perinatal  
20 Health Services,(14) BC Perinatal Data Registry,(15) Québec Pregnancy Cohort,(16) and  
21 Perinatal Program Newfoundland Labrador(17;18) for obtaining outcomes and health services  
22 utilization data during early childhood, and information on the social determinants of health for  
23 all preterm infants.  
24  
25  
26  
27  
28  
29  
30  
31  
32  
33  
34  
35  
36  
37  
38  
39  
40  
41  
42  
43  
44  
45  
46

### 47 *Study population*

48 We will include all preterm births occurring between January, 2018 and December, 2020. Due to  
49 the large number of PTBs in Canada, infants will be stratified into three groups based on GA:  
50 <29 weeks GA; 29 to 33 weeks GA; and 34 to 36 weeks GA. The PTB Network will initially  
51  
52  
53  
54  
55

1  
2  
3 focus on births occurring <29 weeks GA as these infants utilize the most resources and are at the  
4  
5 highest risk for adverse outcomes.  
6  
7  
8  
9

### 10 *Planned activities*

11  
12 The transdisciplinary PTB Network team will use collected data to execute research projects in  
13  
14 each of three integrated research clusters described below. The PTB Network research program  
15  
16 is designed to be flexible and allow for new projects, project modification, collaborations, and  
17  
18 partnerships. The PTB Network Clusters will function as a platform for ongoing integrated  
19  
20 comparative effectiveness research, randomized controlled trials, translational studies, proof-of-  
21  
22 concept studies, health services evaluation, and programmatic evaluations.  
23  
24  
25  
26  
27

### 28 **Cluster 1: Evidence-based QI with outcomes**

29  
30 Canadian initiatives using the Evidence-based Practice for Improving Quality (EPIQ) method led  
31  
32 to a significant improvement in neonatal outcomes.(3-5) To build on those improvements, the  
33  
34 PTB Network protocol will expand the use of EPIQ methods to MFM/OB care practices and the  
35  
36 integration of family members in neonatal care. EPIQ methods will be used to conduct QI  
37  
38 projects following the Promoting Action on Research Implementation in Health Services  
39  
40 (PARIHS) framework of evidence, context and implementation.(19) Using this framework,  
41  
42 transdisciplinary investigators at each site who are trained to conduct bi-annual plan-do-study-act  
43  
44 cycles(20;21) will identify QI strategies of interest using local data and best-available knowledge  
45  
46 in perinatal-neonatal care, implement selected QI activities, and develop and collect process  
47  
48 indicator information pertaining to their QI cycles. The PTB Network will provide sites their  
49  
50 outcomes bi-annually; the sites will identify changes in their performance over time and compare  
51  
52  
53  
54  
55  
56  
57  
58  
59  
60



1  
2  
3 their performance to the national benchmark. Each center will have flexibility to adapt and  
4  
5 choose the QI cycle that is relevant in the context of their unit's current status. We will also work  
6  
7 to simultaneously identify facilitators and barriers to QI project implementation at the  
8  
9 institutional level by conducting focus groups, surveys, site visits and discussions with front-line  
10  
11 staff and families at units to pinpoint items that may impact QI implementation.  
12  
13  
14  
15  
16

## 17 **Cluster 2: Association of maternal, perinatal, and neonatal care with outcomes**

18  
19 Despite a lack of data from large multicenter studies, several emerging and established maternal,  
20  
21 perinatal, and neonatal practices are variably implemented in PTB care centers across Canada. In  
22  
23 Cluster 2, we will identify variable practices, and assess and associate the variability to neonatal  
24  
25 outcomes. Some of the planned initiatives are described below.  
26  
27

- 28  
29 1. *Deferred cord clamping and outcomes:* The practice of deferred cord clamping (DCC) is  
30  
31 markedly variable in Canada (30-40% of preterm infants receive DCC).(22) We will  
32  
33 collect information about DCC duration and reasons for immediate cord clamping, if  
34  
35 DCC was not done. We will calculate the rate of change in DCC implementation over the  
36  
37 three year study period and link data about DCC with neonatal outcomes.  
38  
39
- 40  
41 2. *Antenatal steroids and neurodevelopmental outcomes:* Optimal administration of prenatal  
42  
43 steroids to women at high risk of PTB can improve survival free of major morbidity in  
44  
45 preterm infants.(23;24) However, there are concerns regarding adverse effects of steroids  
46  
47 on the developing brain.(25) We will determine if optimal administration of antenatal  
48  
49 steroids is associated with improved neurodevelopmental (ND) outcomes for neonates.  
50  
51
- 52  
53 3. *Maternal antibiotic use and ND outcomes:* Mothers share their microbes with their infant  
54  
55 and alteration of the early infant gut microbiome is correlated with the development of  
56  
57  
58  
59  
60

1  
2  
3 childhood obesity, asthma, allergies and diabetes (Type 1).(26-28) We will collect data  
4  
5 on the intrapartum use of antibiotics by women with preterm premature rupture of  
6  
7 membranes, spontaneous PTB, and following preterm labor and study the association  
8  
9  
10 between perinatal use of antibiotics and neonatal and ND outcomes.

- 11  
12  
13 4. *Preterm birth phenotypes and outcomes*: Some evidence suggests that PTB is a syndrome  
14  
15 attributable to multiple pathologic processes(29;30) and that neonatal outcomes could be  
16  
17 different based on the reasons for PTB. We will collect data on 6 categories of PTB: (a)  
18  
19 preterm premature rupture of membranes, (b) infection, (c) hemorrhage, (d) hypertensive  
20  
21 disorders of pregnancy, (e) other forms of medically indicated PTB, (f) multiple births,  
22  
23 and (g) idiopathic PTB and attempt to link these to ND outcomes.
- 24  
25  
26 5. *Illness severity and ND outcome*: The management of threatened preterm labor has  
27  
28 improved along with neonatal practices in the first golden hour(31) with gentler handling  
29  
30 of neonates; however, the impact on illness severity and ND outcome is unknown. The  
31  
32 PTB network will collect data regarding peripartum management strategies (*i.e.*,  
33  
34 peripartum interventions, golden hour management) and correlate these with both  
35  
36 neonatal illness severity on admission to the NICU (defined by Score of Neonatal Acute  
37  
38 Physiology Perinatal Extension(32) and Transport Risk Index of Physiologic  
39  
40 Stability(33)) and neonatal outcomes.
- 41  
42  
43 6. *Probiotics and ND outcomes*: Evidence suggests that probiotic administration to preterm  
44  
45 neonates may reduce necrotizing enterocolitis(34) and nosocomial infection,(35) yet only  
46  
47 30% of Canadian neonates receive probiotics(22) We will attempt to link receipt of  
48  
49 probiotics during the NICU stay, as well as type, form (powder vs. liquid), duration, and  
50  
51 timing of probiotics use, with neonatal outcomes.  
52  
53  
54  
55  
56  
57  
58  
59  
60

- 1  
2  
3  
4  
5  
6  
7  
8  
9  
10  
11  
12  
13  
14  
15  
16  
17  
18  
19  
20  
21  
22  
23  
24  
25  
26  
27  
28  
29  
30  
31  
32  
33  
34  
35  
36  
37  
38  
39  
40  
41  
42  
43  
44  
45  
46  
47  
48  
49  
50  
51  
52  
53  
54  
55  
56  
57  
58  
59  
60
7. *Respiratory management of preterm neonates and outcomes:* The need for and duration of invasive respiratory support after PTB is associated with bronchopulmonary dysplasia and other complications. However, the impact of different types of respiratory support and thresholds for different non-invasive, positive end-expiratory pressure (PEEP) on resource utilization and ND outcomes is unknown.(37-39) We will compare two protocols for the provision of respiratory support prior to intubation and after first extubation in preterm neonates using integrated comparative effectiveness research methods.
8. *Family-Integrated Care to improve outcomes:* Integration of families in the care of preterm neonates, particularly early parental engagement, early skin-to-skin care, and parent education, may improve outcomes of preterm neonates.(7) However, the minimal “dose” of these interventions is unknown. In a subset of NICUs, the PTB Network will evaluate the number of hours of 1) parent involvement, 2) skin-to-skin care, and 3) parent education and subsequent positive neonatal and ND outcomes.
9. *Sustainability of QI:* Sustainability of QI initiatives is an increasing concern for funders and stakeholders. The PTB Network will use standard methodology to evaluate QI initiatives in perinatology/neonatology for sustainability.

### **Cluster 3: Economics, resource utilization, and surveillance of PTB**

Current cost estimation methods hint at the large economic burden of PTB in Canada, but they exclude maternal data, rely on simulation modelling, use crude provincial resource utilization data, and lack both granularity and inclusivity over time and across different subgroups.(40)

1. *Developing a costing algorithm for PTB in Canada:* We will develop a costing algorithm for PTB in Canada using a combination of prospective and retrospective data on patient-

1  
2  
3 level resource utilization and resource-specific unit costs attained by purposive and  
4 representative sampling in Canada. We will collect resource utilization data from  
5  
6 perinatal to post-neonatal periods for hospitalized infants from resources like CNN and  
7  
8 the Discharge Abstract Database of the Canadian Institute of Health Information (CIHI).  
9  
10 Unit costs will be calculated using billing data or through attributable costing methods.  
11  
12 Using these data, we will generate a comprehensive algorithm compatible with data  
13  
14 analysis programs.  
15  
16  
17  
18

- 19  
20 2. *Estimating the economic burden of PTB in Canada:* The cost algorithm will be used to  
21  
22 identify the economic burden on the healthcare system of both the entirety of PTB care  
23  
24 and components of PTB care and to analyze how the costs vary by subpopulations, and  
25  
26 provinces/territories in Canada. We will use retrospective and prospective nested cohort  
27  
28 studies to assess healthcare costs accrued by the infant and the parents in the first 2 years  
29  
30 after birth.  
31  
32
- 33  
34 3. *Cost effectiveness of PTB interventions:* We will develop a system-wide economic  
35  
36 decision model. The model will simulate hypothetical dyads of mothers/babies and will  
37  
38 follow the dyad throughout the ante-, peri- and postnatal continuum. Data on resource  
39  
40 utilization, unit costs, and health outcomes from the PTB Network, the Institute for  
41  
42 Clinical Evaluative Sciences and other Canadian organizations, systematic reviews, and  
43  
44 expert consultations will all be utilized in our model. This will allow us to estimate the  
45  
46 cost-effectiveness of PTB interventions and identify those that offer the best outcomes  
47  
48 and are economically efficient.  
49  
50
- 51  
52 4. *Contemporary trends in Canadian PTB rates:* PTB surveillance in Canada lacks timely  
53  
54 and accurate information on PTB rates. The most recent estimate for the PTB rate from  
55  
56  
57  
58  
59  
60

1  
2  
3 the live birth files of Statistics Canada is 7.7% in 2010 and this figure excludes Ontario  
4  
5 births.(1) The PTB Network will calculate both PTB rates and medically-indicated PTB  
6  
7 rates (to identify system issues) in each provinces/territories using Canadian birth cohorts  
8  
9 from 2017 to 2021 (supplemented with data from the 2003-2016 birth cohorts) from the  
10  
11 Discharge Abstract Database of the CIHI and the MED-ECHO database in Quebec.  
12  
13

- 14  
15 5. *Resource utilization by preterm infants:* The number of moderately and late preterm  
16  
17 infants (32-36 weeks) has risen in recent years creating a need to identify which medical  
18  
19 resources these preterm infants use and predictors of increased resource use. We will  
20  
21 identify the health resource utilization patterns during hospitalization and after discharge  
22  
23 for preterm infants in the first 2 years after birth.  
24  
25
- 26 6. *Evaluation of parental experiences:* Integration of families into the care of preterm  
27  
28 infants is important to achieve the best neonatal outcomes(7), but feedback regarding  
29  
30 parent satisfaction with care and suggestions for improvement is not routinely  
31  
32 collected. In addition, the experience of the child and parent post-discharge is not  
33  
34 regularly communicated back to the NICU or Neonatal Follow-up programs. We will  
35  
36 develop an electronic web-based platform to capture parental experiences with the  
37  
38 medical system during their child's hospitalization and for 2 years post-NICU discharge.  
39  
40  
41  
42  
43

#### 44 **Ethics, data analysis, and timeline**

##### 45 *Data coordination and ethics*

46  
47  
48  
49 The coordination center for the PTB Network will be located at the Maternal-Infant Care  
50  
51 Research Center at Mount Sinai Hospital, Toronto. The centralized data management system  
52  
53 conforms to both the Health Information Protection Act and Privacy and Personal Information  
54  
55

1  
2  
3 Protection Act regulations and is approved by the Mount Sinai research ethics board for  
4 collection, development, and hosting of the PTB Network dataset, in order to ensure data  
5 integrity and security. Individual sites will receive approval from local research ethics boards, or  
6 quality improvement committees as appropriate.  
7  
8  
9

### 10 *Sample size*

11  
12 During the 3 years of data collection, we will prospectively collect information on ~1500 infants  
13 <29 weeks' gestation per year. Assuming 15% mortality and 20% loss to follow-up, we  
14 anticipate we will collect neonatal and ND outcome data from 1000 neonates per year. A sample  
15 this size will provide >90% power to detect a 30% relative increase in survival free of neonatal  
16 morbidity (baseline 47% to 61%) and 30% relative decrease in significant ND impairment  
17 (baseline 17% to 11.9%) in the last year compared with the first year at a significance level of  
18 0.05 after accounting for clustering within each site.(41) Under the same assumptions, a  
19 conservative estimate of 20% change in the two outcomes will have >80% power. Sample size  
20 for nested cohorts will be determined based on feasibility.  
21  
22  
23  
24  
25  
26  
27  
28  
29  
30  
31  
32  
33  
34

### 35 *Analyses plan*

36  
37 We plan to utilize specific QI based analyses to identify special-cause variation, adjusted  
38 analyses to generate standardize ratios, and comparative plots for site comparisons. Analysis  
39 details are provided in Appendix 1.  
40  
41  
42  
43

### 44 *Timeline*

45  
46 The research described in this PTB Network protocol will continue through 2021. Nested cohort  
47 studies of economic, parental experiences, and specific projects will be spread over the study  
48 duration as outlined in Figure 2.  
49  
50  
51  
52  
53  
54  
55  
56  
57  
58  
59  
60

## **Interpretation**

PTB is expensive and not uncommon. Every year, 25 000 to 30 000 preterm infants are born in Canada(42) and the majority survive for >70 years, impacting the healthcare system to a greater extent than any other chronic condition. Thus, improving PTB outcomes can significantly improve quality of life and reduce healthcare costs over the life-course. In this program, we propose to address existing gaps in maternal-perinatal-neonatal research and strive for outcomes improvement by creating a transdisciplinary team working within an objectively-structured performance measurement framework.

## *Conclusion*

The PTB Network will be a national network encompassing the spectrum of maternal-fetal-neonatal-childhood events that affect outcomes of preterm infants. Our goals for the PTB Network are three fold: 1) to enable multidisciplinary evidence-based practice change that results in improved neonatal outcomes, 2) to evaluate and standardize PTB interventions across Canada by associating practices with improved outcomes, and 3) to estimate the economic burden of PTB and the cost-effectiveness of PTB interventions with the objective of improving the standard of care and guiding efficient resource allocation.

## Acknowledgements

We thank all site investigators their continuous support. We also thank Sarah Hutchinson, PhD and Natasha Musrap, PhD from the Maternal-Infant Care Research Centre for editorial assistance in the preparation of this manuscript. Organizational support for the PTB Network was provided by the Maternal-Infant Care Research Centre at Mount Sinai Hospital in Toronto, ON, Canada. MiCare is supported by a team grant from the Canadian Institutes of Health Research (CIHR, FRN87518) and in-kind support from Mount Sinai Hospital. The Canadian Preterm Birth Network is supported by a CIHR Preterm Birth Network Team Grant (PBN150642). Drs Joseph and Shah hold Applied Research Chairs in Reproductive and Child Health Services and Policy Research awarded by the CIHR (APR-126338 and APR-126340, respectively). Dr. Sarah D. McDonald is supported by a Tier II Canada Research Chair.

## Authors' contributions

All investigators conceived of the PTB Network concept, PSS led the protocol design process, and drafted the manuscript. All the remaining authors (SDM, JB, AS, KR, JF, JCP, KSJ, BP, TL, KO, SS, NC, PP) participated in network and protocol design, and will direct the collection of data, dissemination of knowledge, and implementation of practice changes. All authors approved the final manuscript.



## Reference List

- (1) Public Health Agency of Canada. Perinatal Health Indicators for Canada 2013: A report of the Canadian Perinatal Surveillance System. Ottawa; 2013.
- (2) Lim G, Tracey J, Boom N, Karmakar S, Wang J, Berthelot JM, et al. CIHI survey: Hospital costs for preterm and small-for-gestational age babies in Canada. *Healthc Q* 2009;12(4):20-4.
- (3) Lee SK, Aziz K, Singhal N, Cronin CM, James A, Lee DS, et al. Improving the quality of care for infants: a cluster randomized controlled trial. *CMAJ* 2009 Oct 13;181(8):469-76.
- (4) Lee SK, Shah PS, Singhal N, Aziz K, Synnes A, McMillan D, et al. Association of a quality improvement program with neonatal outcomes in extremely preterm infants: a prospective cohort study. *CMAJ* 2014 Sep 16;186(13):E485-E494.
- (5) Lee SK, Aziz K, Singhal N, Cronin CM. The Evidence-based Practice for Improving Quality method has greater impact on improvement of outcomes than dissemination of practice change guidelines and quality improvement training in neonatal intensive care units. *Paediatr Child Health* 2015 Jan;20(1):e1-e9.
- (6) Lodha A, Seshia M, McMillan DD, Barrington K, Yang J, Lee SK, et al. Association of early caffeine administration and neonatal outcomes in very preterm neonates. *JAMA Pediatr* 2015 Jan;169(1):33-8.
- (7) O'Brien K, Bracht M, MacDonell K, McBride T, Robson K, O'Leary L, et al. A pilot cohort analytic study of Family Integrated Care in a Canadian neonatal intensive care unit. *BMC Pregnancy & Childbirth* 2013;13(Suppl 1):S12.
- (8) Soraisham AS, Harabor A, Shivananda S, Alvaro R, Ye XY, Lee SK, et al. Trends and Variations in the Use of Inhaled Nitric Oxide in Preterm Infants in Canadian Neonatal Intensive Care Units. *Am J Perinatol* 2016 Jun;33(7):715-22.
- (9) Shah PS, Seidlitz W, Chan P, Yeh S, Musrap N, Lee SK. Internal Audit of the Canadian Neonatal Network Data Collection System. *Am J Perinatol* 2017 May 12.
- (10) Canadian Neonatal Follow-Up Network [Internet]. 2017 [cited <http://www.cnfun.ca/>]
- (11) Canadian Pediatric Surgery Network [Internet]. 6-26-2017 [cited 8-23-2017]. Available from: <http://www.capsnetwork.org/>
- (12) Better Outcomes Registry & Network:Ontario [Internet]. 6-10-2017 [cited 8-23-2017]. Available from: <https://www.bornontario.ca/>
- (13) The Nova Scotia Atlee Perinatal Database [Internet]. 3-27-2016 [cited 8-23-2017]. Available from: <http://rcp.nshealth.ca/atlee-database>
- (14) Alberta Perinatal Health Program [Internet]. 5-17-2017 [cited 8-23-2017]. Available from: <http://aphp.dapasoft.com/Lists/HTMLPages/index.aspx>

- 1  
2  
3 (15) Perinatal Services BC [Internet]. 8-22-2017 [cited 8-23-2017].  
4 Available from: <http://www.perinataleservicesbc.ca/>  
5  
6 (16) Quebec Pregnancy Cohort (Canada) [Internet]. 5-20-2012 [cited 8-23-2017].  
7 Available from: <https://www.bridgetodata.org/node/1013>  
8  
9 (17) Perinatal Program: Newfoundland Labrador [Internet]. 6-30-2017 [cited 8-23-2017].  
10 Available from: <http://www.easternhealth.ca/Professionals.aspx?d=1&id=1972&p=81>  
11  
12 (18) Perinatal Program Newfoundland Labrador: Data Collection [Internet]. 6-30-2017 [cited 8-  
13 23-2017].  
14 Available from:  
15  
16 (19) Rycroft-Malone J, Kitson A, Harvey G, McCormack B, Seers K, Titchen A, et al. Ingredients  
17 for change: revisiting a conceptual framework. *Qual Saf Health Care* 2002 Jun;11(2):174-80.  
18  
19 (20) Shah V, Warre R, Lee SK. Quality improvement initiatives in neonatal intensive care unit  
20 networks: achievements and challenges. *Acad Pediatr* 2013 Nov;13(6 Suppl):S75-S83.  
21  
22 (21) Plsek PE. Quality improvement methods in clinical medicine. *Pediatrics* 1999 Jan;103(1  
23 Suppl E):203-14.  
24  
25 (22) The Canadian Neonatal Network. The Canadian Neonatal Network Annual Report, 2014.  
26 2014.  
27  
28 (23) Melamed N, Shah J, Soraisham A, Yoon EW, Lee SK, Shah PS, et al. Association between  
29 antenatal corticosteroid administration-to-birth interval and outcomes of preterm neonates.  
30 *Obstet Gynecol* 2015 Jun;125(6):1377-84.  
31  
32 (24) Melamed N, Shah J, Yoon EW, Pelausa E, Lee SK, Shah PS, et al. The role of antenatal  
33 corticosteroids in twin pregnancies complicated by preterm birth. *Am J Obstet Gynecol*  
34 2016 Jun 1.  
35  
36 (25) Bustamante C, Valencia M, Torres C, Gonzalez MJ, Carvajal C, Sandoval D, et al. Effects of  
37 a single course of prenatal betamethasone on dendritic development in dentate gyrus  
38 granular neurons and on spatial memory in rat offspring. *Neuropediatrics* 2014  
39 Dec;45(6):354-61.  
40  
41 (26) Kenyon S, Pike K, Jones DR, Brocklehurst P, Marlow N, Salt A, et al. Childhood outcomes  
42 after prescription of antibiotics to pregnant women with spontaneous preterm labour: 7-year  
43 follow-up of the ORACLE II trial. *Lancet* 2008 Oct 11;372(9646):1319-27.  
44  
45 (27) Kuperman AA, Koren O. Antibiotic use during pregnancy: how bad is it? *BMC Med*  
46 2016;14(1):91.  
47  
48 (28) Tamburini S, Shen N, Wu HC, Clemente JC. The microbiome in early life: implications for  
49 health outcomes. *Nat Med* 2016 Jul 7;22(7):713-22.  
50  
51  
52  
53  
54  
55  
56  
57  
58  
59  
60

- 1
- 2
- 3 (29) Esplin MS. The Importance of Clinical Phenotype in Understanding and Preventing
- 4 Spontaneous Preterm Birth. *Am J Perinatol* 2016 Feb;33(3):236-44.
- 5
- 6 (30) Manuck TA, Esplin MS, Biggio J, Bukowski R, Parry S, Zhang H, et al. The phenotype of
- 7 spontaneous preterm birth: application of a clinical phenotyping tool. *Am J Obstet Gynecol*
- 8 2015 Apr;212(4):487.
- 9
- 10 (31) Wyckoff MH. Initial resuscitation and stabilization of the periviable neonate: the Golden-
- 11 Hour approach. *Semin Perinatol* 2014 Feb;38(1):12-6.
- 12
- 13 (32) Richardson DK, Corcoran JD, Escobar GJ, Lee SK. SNAP-II and SNAPPE-II: Simplified
- 14 newborn illness severity and mortality risk scores. *J Pediatr* 2001 Jan;138(1):92-100.
- 15
- 16 (33) Lee SK, Aziz K, Dunn M, Clarke M, Kovacs L, Ojah C, et al. Transport Risk Index of
- 17 Physiologic Stability, version II (TRIPS-II): a simple and practical neonatal illness severity
- 18 score. *Am J Perinatol* 2013 May;30(5):395-400.
- 19
- 20 (34) AlFaleh K, Anabrees J. Probiotics for prevention of necrotizing enterocolitis in preterm
- 21 infants. *Evid Based Child Health* 2014 Sep;9(3):584-671.
- 22
- 23 (35) Rao SC, Athalye-Jape GK, Deshpande GC, Simmer KN, Patole SK. Probiotic
- 24 supplementation and late-onset sepsis in preterm infants: a meta-analysis. *Pediatrics* 2016
- 25 Mar;137(3):e20153684.
- 26
- 27 (36) Unger S, Stintzi A, Shah P, Mack D, O'Connor DL. Gut microbiota of the very-low-birth-
- 28 weight infant. *Pediatr Res* 2015 Jan;77(1-2):205-13.
- 29
- 30 (37) Baraldi E, Filippone M. Chronic lung disease after premature birth. *N Engl J Med* 2007 Nov
- 31 8;357(19):1946-55.
- 32
- 33 (38) Jobe AH. The New BPD. *Neoreviews* 2006;7:e531-e545.
- 34
- 35 (39) Schmolzer GM, Te Pas AB, Davis PG, Morley CJ. Reducing lung injury during neonatal
- 36 resuscitation of preterm infants. *J Pediatr* 2008 Dec;153(6):741-5.
- 37
- 38 (40) Johnston KM, Gooch K, Korol E, Vo P, Eyawo O, Bradt P, et al. The economic burden of
- 39 prematurity in Canada. *BMC Pediatr* 2014;14:93.
- 40
- 41 (41) Lachin JM. Biostatistical methods: the assessment of relative risks. New York: John Wiley &
- 42 Sons, Inc; 2000.
- 43
- 44 (42) Statistics Canada. Table 102-4512 - Live births, by weeks of gestation and sex, Canada,
- 45 provinces and territories, annual. 2013.
- 46
- 47 (43) Plsek PE. Tutorial: introduction to control charts. *Qual Manag Health Care* 1992;1(1):65-74.
- 48
- 49
- 50
- 51
- 52
- 53
- 54
- 55
- 56
- 57
- 58
- 59
- 60

1  
2  
3 **Figure legends**  
4

5 **Figure 1: Map of the Canadian Preterm Birth Network**  
6

7 Red dots indicate approximate location of all 31 participating hospitals.  
8

9  
10 Abbreviations: CNN, Canadian Neonatal Network; CNFUN, Canadian Neonatal Follow-Up  
11 Network; CAPSNet, Canadian Pediatric Surgery Network; CSMFM, Canadian Society of  
12 Maternal Fetal Medicine  
13  
14  
15  
16  
17  
18

19 **Figure 2: Timeline of PTB Network research projects**  
20

21 Depiction of the approximate timeline for projects described in the PTB Network Clusters.  
22

23  
24 \*Projects not described in this protocol  
25  
26  
27  
28  
29  
30  
31  
32  
33  
34  
35  
36  
37  
38  
39  
40  
41  
42  
43  
44  
45  
46  
47  
48  
49  
50  
51  
52  
53  
54  
55  
56  
57  
58  
59  
60

Confidential

1  
2  
3  
4  
5  
6  
7  
8  
9  
10  
11  
12  
13  
14  
15  
16  
17  
18  
19  
20  
21  
22  
23  
24  
25  
26  
27  
28  
29  
30  
31  
32  
33  
34  
35  
36  
37  
38  
39  
40  
41  
42  
43  
44  
45  
46  
47  
48  
49  
50  
51  
52  
53  
54  
55  
56  
57  
58  
59  
60

Confidential

# Canadian Preterm Birth Network

**CNN – CNFUN – CNTN – CAPSNet – CSMFM**

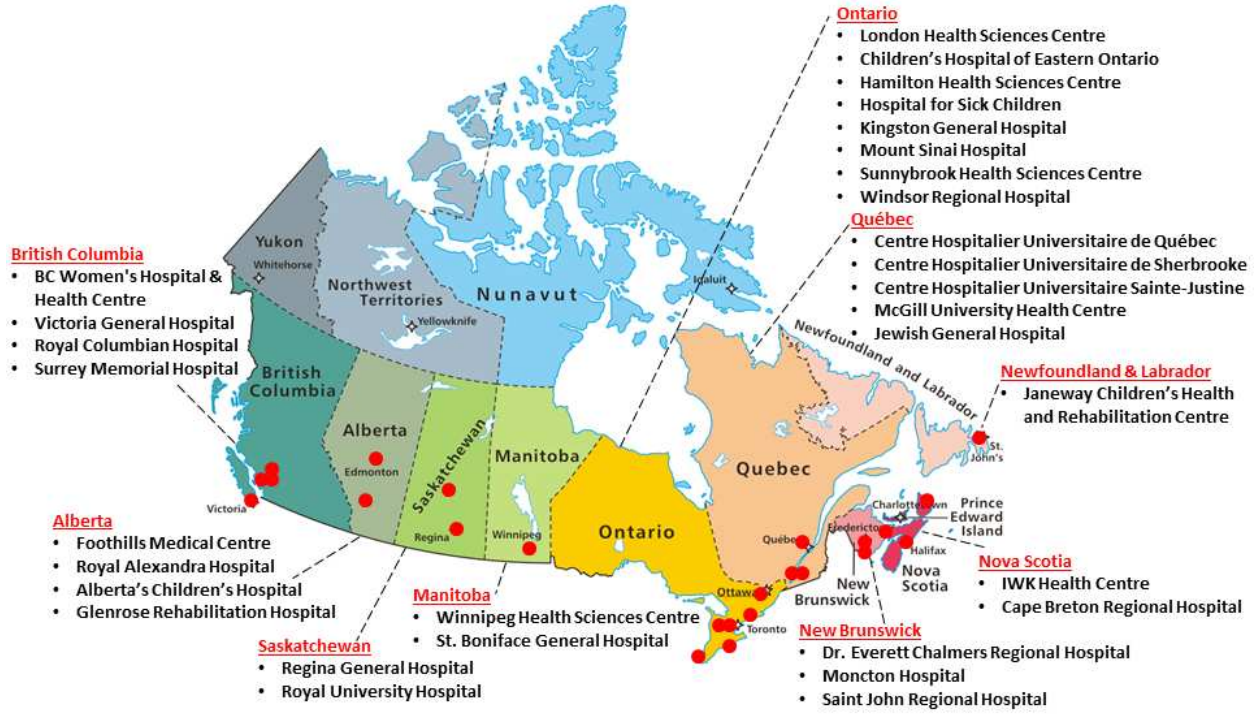

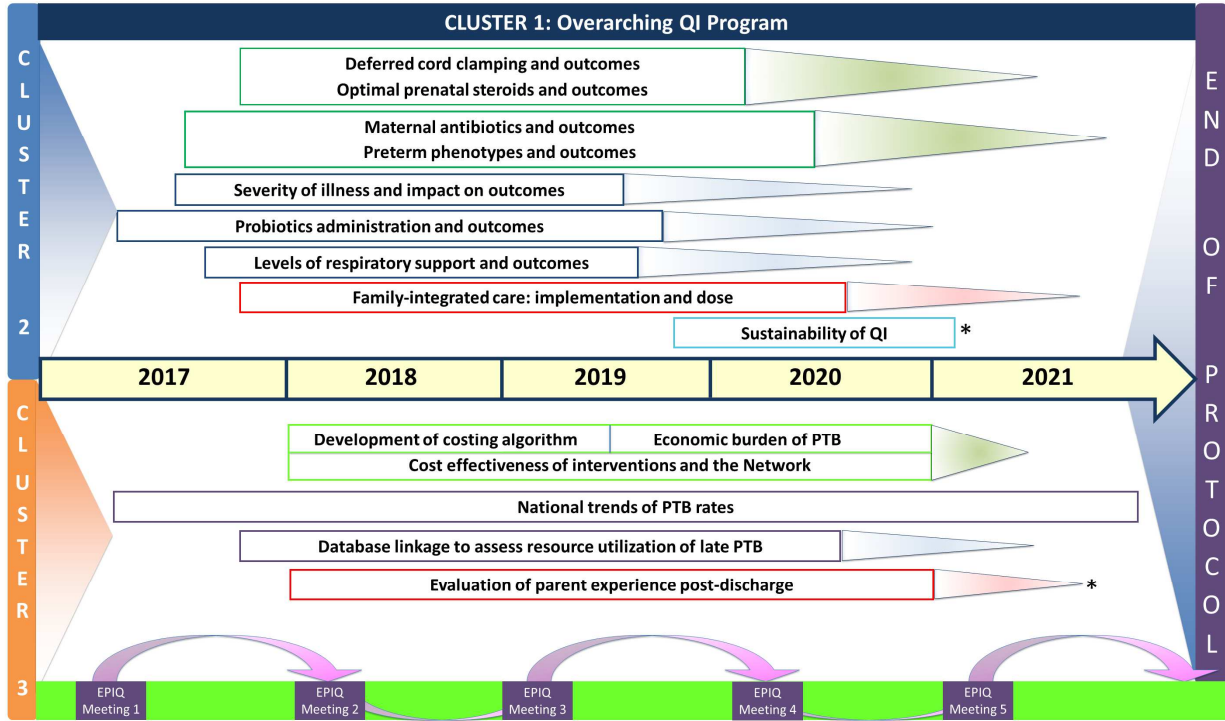

Confidential

## Appendix 1

### *QI analyses*

To track the impact of all QI initiatives we will monitor sites' progress by analyzing the common cause and special cause variations of process measures using upper and lower control limits (UCL and LCL) in a Shewhart chart (control chart or P chart) every three months and identifying positive changes.(21;43) When special cause variation is not identified, sites will assume that the process is "stable" and sites will implement the next QI strategy. In the event of a practice change with the potential for unintended consequences, the team will use the lower control limit (2 sigma, rather than 3 sigma) to abandon the practice. Sites' progress will also be analyzed using benchmarking. For each outcome, we will calculate adjusted rates and associated 95% confidence intervals and present them graphically using caterpillar plots to visually differentiate between EPIQ sites. We will use indirect standardization to estimate standardized ratios and adjust for multiple baseline characteristics and differences in important health care practices. The expected number of events will be computed as the sum of predicted probabilities from a Bayesian hierarchical generalized linear model (multilevel logistic regression or zero inflated negative binomial models, depending upon data distribution) of all individual patient data from all participating sites adjusted for patient and hospital level attributes. The Bayesian model will also allow us to stabilize the rate for small hospitals with few admissions. We will graphically display site standardized ratios using funnel plots with 95% prediction intervals to examine the variation between sites within the PTB Network.

### *Comparisons and trends analysis*

The PTB Network will collect data from the baseline year, 2018, until the last intervention year, 2020. We will compare infant characteristics over years, using a Chi-square test, ANOVA or



1  
2  
3 Wilcoxon Rank Sum test, as appropriate. To test trends in infant characteristics; temporal trends;  
4 and variations in PTB rates, phenotypes, and subtypes (e.g., late, moderate, and extreme PTB;  
5 spontaneous and medically-indicated PTB) in Canada we will use a Cochran-Armitage trend test  
6 or linear regression as applicable. Overall outcomes will be compared using the Cochran-Mantel-  
7 Haenszel test to account for clustering within each site and Bayesian hierarchical generalized  
8 linear models adjusting for confounders, risk factors, and site characteristics. If applicable, we  
9 will perform piecewise hierarchical linear (over time) regression modeling with autoregressive  
10 covariance structure and a time series approach, adjusting for patient and site level factors, to  
11 assess the effectiveness of the interventions. Sub-analysis stratified by GA (< 26 weeks' and 26 –  
12 29 weeks' GA groups) will be conducted.  
13  
14  
15  
16  
17  
18  
19  
20  
21  
22  
23  
24  
25  
26  
27  
28  
29  
30  
31  
32  
33  
34  
35  
36  
37  
38  
39  
40  
41  
42  
43  
44  
45  
46  
47  
48  
49  
50  
51  
52  
53  
54  
55  
56  
57  
58  
59  
60

1  
2  
3  
4  
5  
6  
7  
8  
9  
10  
11  
12  
13  
14  
15  
16  
17  
18  
19  
20  
21  
22  
23  
24  
25  
26  
27  
28  
29  
30  
31  
32  
33  
34  
35  
36  
37  
38  
39  
40  
41  
42  
43  
44  
45  
46  
47  
48  
49  
50  
51  
52  
53  
54  
55  
56  
57  
58  
59  
60

Confidential

## Appendix 2

### Investigators of the PTB Network

Haim Abenhaim, MD, Jewish General Hospital, Montréal, Québec; Jehier Afifi, MBBCh, MSc, IWK Health Centre, Halifax, Nova Scotia; Ruben Alvaro, MD, St. Boniface General Hospital, Winnipeg, Manitoba; James Andrews, MD, Saint John Regional Hospital, Saint John, New Brunswick; Anthony Armson, MD, IWK Health Centre, Halifax, Nova Scotia; Francois Audibert, MD, Hôpital Sainte-Justine, Montréal, Québec; Khalid Aziz, MBBS, MA, Med, Royal Alexandra Hospital, Edmonton, Alberta; Marilyn Ballantyne, RN, PhD, Holland Bloorview Kids Rehabilitation Hospital, Toronto, Ontario; Jon Barrett, MD, Sunnybrook Health Sciences Center, Sunnybrook Research Institute, Toronto, Ontario, Canada; Marc Beltempo, MD, McGill University Health Centre, Montréal, Québec; Anick Berard, PhD, Université de Montréal, Montréal, Québec; Valerie Bertelle, MD, Centre Hospitalier Universitaire de Sherbrooke, Sherbrooke, Québec; Lucie Blais, PhD, Université de Montréal, Montréal, Québec; Alan Bocking, MD, Mount Sinai Hospital, Toronto, Ontario; Jaya Bodani, MD, Regina General Hospital, Regina, Saskatchewan; ; Jason Burrows, MD, Surrey Memorial Hospital, Surrey, British Columbia; Kimberly Butt, MD, Dr. Everett Chalmers Hospital, Fredericton, New Brunswick; Roderick Canning, MD, Moncton Hospital, Moncton, New Brunswick; George Carson, MD, Regina General Hospital, Regina, Saskatchewan; Nils Chaillet, PhD, Université Laval, Québec City, Québec, Canada; Sue Chandra, MD, Royal Alexandra Hospital, Edmonton, Alberta; Paige Church, MD, Sunnybrook Health Sciences Centre, Toronto, Ontario; Zenon Cieslak, MD, Royal Columbian Hospital, New Westminster, British Columbia; Kevin Coughlin, MD, London, Ontario; Joan Crane, MD, Janeway Children's Health and Rehabilitation Centre, St. John's, Newfoundland; Dianne Creighton, PhD, Alberta Children's Hospital, Calgary,

1  
2  
3 Alberta; Orlando Da Silva, MD, MSc, London Health Sciences Centre, London, Ontario; Thierry  
4 Daboval, MD, Children's Hospital of Eastern Ontario, Ottawa, Ontario; Leanne Dahlgren, MD,  
5 Children's & Women's Health Centre of BC, Vancouver, British Columbia; Sibasis Daspal, MD,  
6 Royal University Hospital, Saskatoon, Saskatchewan; Cecilia de Cabo, MD, University of  
7 Manitoba, Winnipeg, Manitoba; Akhil Deshpandey, MBBS, MRCPI, Janeway Children's Health  
8 and Rehabilitation Centre, St. John's, Newfoundland; Kimberly Dow, MD, Kingston General  
9 Hospital, Kingston, Ontario; Christine Drolet, MD, Centre Hospitalier Universitaire de Québec,  
10 Sainte Foy, Québec; Michael Dunn, MD, Sunnybrook Health Sciences Centre, Toronto, Ontario;  
11 Salhab el Helou, MD, Hamilton Health Sciences Centre, Hamilton, Ontario; Darine El-Chaar,  
12 MD, Children's Hospital of Eastern Ontario, Ottawa, Ontario; Walid El-Naggar, MD, IWK  
13 Health Centre, Halifax, Nova Scotia; Carlos Fajardo, MD, Alberta Children's Hospital, Calgary,  
14 Alberta; Jonathan Foster, Canadian Premature Babies Foundation, Toronto, Ontario, Canada;  
15 Robert Gagnon, MD, McGill University Health Centre, Montréal, Québec; Rob Gratton, MD,  
16 London Health Sciences Centre, London, Ontario; Victor Han, MD, University of Western  
17 Ontario, London, Ontario; Adele Harrison, MD, MBChB, Victoria General Hospital, Victoria,  
18 British Columbia; Shabih Hasan, MD, University of Calgary, Calgary, Alberta; Michael Helewa,  
19 MD, St. Boniface General Hospital, Winnipeg, Manitoba; Matthew Hicks, MD, PhD, University  
20 of Alberta, Edmonton, Alberta; KS Joseph, MD, PhD, University of British Columbia,  
21 Vancouver, British Columbia; Andrzej Kajetanowicz, MD, Cape Breton Regional Hospital,  
22 Sydney, Nova Scotia; Zarin Kalapesi, MD, Regina General Hospital, Regina, Saskatchewan;  
23 May Khairy, MD, McGill University, Montréal, Québec; Thierry Lacaze-Masmonteil, MD,  
24 Alberta Health Services and the Cumming School of Medicine, University of Calgary, Calgary,  
25 Alberta; Kyong-Soon Lee, MD, MSc, Hospital for Sick Children, Toronto, Ontario; Brigitte

1  
2  
3 Lemyre, MD, Children's Hospital of Eastern Ontario and Ottawa General Hospital, Ottawa,  
4 Ontario; Abhay Lodha, MD, Foothills Medical Centre, Calgary, Alberta;  
5  
6 Deepak Louis, MD, University of Manitoba, Winnipeg, Manitoba; Thuy Mai Luu, MD, MSc,  
7 University of Montréal, Montréal, Québec; Linh Ly, MD, Hospital for Sick Children, Toronto,  
8 Ontario; Annette Majnemer, PhD, MSc McGill University, Montréal, Québec; Hala Makary,  
9 MD, Dr. Everett Chalmers Hospital, Fredericton, New Brunswick; Isabelle Marc, MD,  
10 Université Laval, Québec City, Québec; Edith Masse, MD, Centre Hospitalier Universitaire de  
11 Sherbrooke, Sherbrooke, Québec; Sarah D McDonald, MD, MSc, McMaster University,  
12 Hamilton, Ontario; Doug McMillan, MD, IWK Health Centre, Halifax, Nova Scotia; Nir  
13 Melamed, MD, Sunnybrook Health Sciences Centre, Toronto, Ontario; Amy Metcalfe, PhD,  
14 Foothills Medical Centre, University of Calgary, Calgary, Alberta; Diane Moddemann, MD,  
15 Med, University of Manitoba, Winnipeg, Manitoba; Luis Monterrosa, MD, Saint John Regional  
16 Hospital, Saint John, New Brunswick; Michelle Morais, MD, Hamilton Health Sciences Centre,  
17 Hamilton, Ontario; Amit Mukerji, MD, Hamilton Health Sciences Centre, Hamilton, Ontario;  
18 William Mundle, MD, Windsor Regional Hospital, Windsor, Ontario; Lynn Murphy, MD,  
19 Moncton Hospital, Moncton, New Brunswick; Kellie Murphy, MD, Mount Sinai Hospital,  
20 Toronto, Ontario; Anne-Monique Nuyt, MD, Hôpital Sainte-Justine, Montréal, Québec; Chuks  
21 Nwaesei, MD, Windsor Regional Hospital, Windsor, Ontario; Karel O'Brien, MD, Mount Sinai  
22 Hospital, Toronto, Ontario; Martin Offringa, MD, Hospital for Sick Children, Toronto, Ontario;  
23 Cecil Ojah, MBBS, Saint John Regional Hospital, Saint John, New Brunswick; Annie Ouellet,  
24 MD, Centre Hospitalier Universitaire de Sherbrooke, Sherbrooke, Québec; Jean-Charles  
25 Pasquier, MD, PhD, Université de Sherbrooke, Sherbrooke, Québec; Petros Pechlivanoglou,  
26 PhD, The Hospital for Sick Children, Toronto, Ontario, Canada; Ermelinda Pelausa, MD, Jewish  
27  
28  
29  
30  
31  
32  
33  
34  
35  
36  
37  
38  
39  
40  
41  
42  
43  
44  
45  
46  
47  
48  
49  
50  
51  
52  
53  
54  
55  
56  
57  
58  
59  
60

1  
2  
3 General Hospital, Montréal, Québec; Bruno Piedboeuf, MD, Université Laval, Québec City,  
4 Québec; Elodie Portales-Casamar, PhD, BC Children's Hospital, Vancouver, Ontario; Shahirose  
5 Premji, PhD, University of Calgary, Calgary, Alberta; Pramod Puligandla, MD, MSc, McGill  
6 University, Montréal, Québec; Eleanor Pullenayegum, PhD, Hospital for Sick Children, Toronto,  
7 Ontario; Amber Reichert, MD, Glenrose Rehabilitation Hospital, Edmonton, Alberta; Kate  
8 Robson, Canadian Premature Babies Foundation, Toronto, Ontario, Canada; Carol Schneider,  
9 MD, Winnipeg Health Sciences Centre, Winnipeg, Manitoba; Mary Seshia, MBChB, Winnipeg  
10 Health Sciences Centre, Winnipeg, Manitoba; Prakesh S Shah, MD, MSc, Mount Sinai Hospital,  
11 Toronto, Ontario; Vibhuti Shah, MD, MSc, Mount Sinai Hospital, Toronto, Ontario; Rebecca  
12 Sherlock, MD, Surrey Memorial Hospital, Surrey, British Columbia; Sandesh Shivananda, MD,  
13 MSc, University of British Columbia, Vancouver, British Columbia; Nalini Singhal, MD,  
14 Alberta Children's Hospital, Calgary, Alberta; Erik Skarsgard, MD, BC Children's Hospital,  
15 Vancouver, British Columbia; Amanda Skoll, MD, BC Women's Hospital and Health Center,  
16 Vancouver, British Columbia; Graeme Smith, MD, Kingston General Hospital, Kingston,  
17 Ontario; Anne Synnes, MDCM, MHSC, University of British Columbia, Vancouver, British  
18 Columbia; Katherine Thériault, MD, Centre Hospitalier Universitaire de Québec, Sainte Foy,  
19 Québec; Joseph Ting, MD, BC Women's Hospital and Health Centre, Vancouver, British  
20 Columbia; Suzanne Tough, PhD, University of Calgary, Calgary, Alberta; Jennifer Toye, MD,  
21 Royal Alexandra Hospital, Edmonton, Alberta; Jagdeep Ubhi, MD, Royal Columbian Hospital,  
22 New Westminster, British Columbia; Michael Vincer, MD, IWK Health Centre, Halifax, Nova  
23 Scotia; Wendy Whittle, MD, PhD, Mount Sinai Hospital, Toronto, Ontario; Hilary Whyte, MD,  
24 Hospital for Sick Children, Toronto, Ontario; Doug Wilson, MD, Foothills Medical Centre,  
25 Calgary, Alberta; Stephen Wood, MD, Foothills Medical Centre, Calgary, Alberta; Philip Ye,  
26  
27  
28  
29  
30  
31  
32  
33  
34  
35  
36  
37  
38  
39  
40  
41  
42  
43  
44  
45  
46  
47  
48  
49  
50  
51  
52  
53  
54  
55  
56  
57  
58  
59  
60

1  
2  
3 Msc, Mount Sinai Hospital, Toronto, Ontario; Wendy Yee, MD, Foothills Medical Centre,  
4  
5 Calgary, Alberta; Jill Zwicker, PhD, University of British Columbia, Vancouver, British  
6  
7 Columbia.  
8  
9  
10  
11  
12  
13  
14  
15  
16  
17  
18  
19  
20  
21  
22  
23  
24  
25  
26  
27  
28  
29  
30  
31  
32  
33  
34  
35  
36  
37  
38  
39  
40  
41  
42  
43  
44  
45  
46  
47  
48  
49  
50  
51  
52  
53  
54  
55  
56  
57  
58  
59  
60

Confidential

## The Canadian Preterm Birth Network: a study protocol for improving outcomes for preterm infants and their families

STROBE Statement—checklist of items that should be included in reports of observational studies

|                              | Item No | Recommendation                                                                                                                                                                                                                                                                                                                                                                                                                                                                                                                                                                                                                                                                                                                     |
|------------------------------|---------|------------------------------------------------------------------------------------------------------------------------------------------------------------------------------------------------------------------------------------------------------------------------------------------------------------------------------------------------------------------------------------------------------------------------------------------------------------------------------------------------------------------------------------------------------------------------------------------------------------------------------------------------------------------------------------------------------------------------------------|
| <b>Title and abstract</b>    | 1       | (a) Indicate the study's design with a commonly used term in the title or the abstract<br><b>Found on p.1 in title</b><br>(b) Provide in the abstract an informative and balanced summary of what was done and what was found <b>Found on p. 3 in abstract</b>                                                                                                                                                                                                                                                                                                                                                                                                                                                                     |
| <b>Introduction</b>          |         |                                                                                                                                                                                                                                                                                                                                                                                                                                                                                                                                                                                                                                                                                                                                    |
| Background/rationale         | 2       | Explain the scientific background and rationale for the investigation being reported<br><b>Found on p. 4 in introduction</b>                                                                                                                                                                                                                                                                                                                                                                                                                                                                                                                                                                                                       |
| Objectives                   | 3       | State specific objectives, including any prespecified hypotheses <b>Found on p. 4-5 in introduction</b>                                                                                                                                                                                                                                                                                                                                                                                                                                                                                                                                                                                                                            |
| <b>Methods</b>               |         |                                                                                                                                                                                                                                                                                                                                                                                                                                                                                                                                                                                                                                                                                                                                    |
| Study design                 | 4       | Present key elements of study design early in the paper <b>Found on p. 5-6 in methods, p. 6-9 in sections Cluster 1, cluster 2 and cluster 3.</b>                                                                                                                                                                                                                                                                                                                                                                                                                                                                                                                                                                                  |
| Setting                      | 5       | Describe the setting, locations, and relevant dates, including periods of recruitment, exposure, follow-up, and data collection <b>Found on p. 5-6 in methods</b>                                                                                                                                                                                                                                                                                                                                                                                                                                                                                                                                                                  |
| Participants                 | 6       | (a) <i>Cohort study</i> —Give the eligibility criteria, and the sources and methods of selection of participants. Describe methods of follow-up <b>Found on p. 5-6 in methods</b><br><i>Case-control study</i> —Give the eligibility criteria, and the sources and methods of case ascertainment and control selection. Give the rationale for the choice of cases and controls<br><i>Cross-sectional study</i> —Give the eligibility criteria, and the sources and methods of selection of participants<br>(b) <i>Cohort study</i> —For matched studies, give matching criteria and number of exposed and unexposed<br><i>Case-control study</i> —For matched studies, give matching criteria and the number of controls per case |
| Variables                    | 7       | Clearly define all outcomes, exposures, predictors, potential confounders, and effect modifiers. Give diagnostic criteria, if applicable paper <b>Found on p. 5-6 in methods, p. 6-9 in sections Cluster 1, cluster 2 and cluster 3.</b>                                                                                                                                                                                                                                                                                                                                                                                                                                                                                           |
| Data sources/<br>measurement | 8*      | For each variable of interest, give sources of data and details of methods of assessment (measurement). Describe comparability of assessment methods if there is more than one group <b>Found on p. 5-6 in methods; p. 11-12 in ethics, data collection, and timeline; and appendix 1.</b>                                                                                                                                                                                                                                                                                                                                                                                                                                         |
| Bias                         | 9       | Describe any efforts to address potential sources of bias <b>Found in appendix 1</b>                                                                                                                                                                                                                                                                                                                                                                                                                                                                                                                                                                                                                                               |
| Study size                   | 10      | Explain how the study size was arrived at <b>Found on p. 5-6 in methods, study population</b>                                                                                                                                                                                                                                                                                                                                                                                                                                                                                                                                                                                                                                      |
| Quantitative variables       | 11      | Explain how quantitative variables were handled in the analyses. If applicable, describe which groupings were chosen and why <b>Found in appendix 1, TBD</b>                                                                                                                                                                                                                                                                                                                                                                                                                                                                                                                                                                       |
| Statistical methods          | 12      | (a) Describe all statistical methods, including those used to control for confounding <b>Found in appendix 1, TBD</b><br>(b) Describe any methods used to examine subgroups and interactions <b>Found in</b>                                                                                                                                                                                                                                                                                                                                                                                                                                                                                                                       |



appendix 1, TBD

(c) Explain how missing data were addressed Found in appendix 1, TBD

(d) *Cohort study*—If applicable, explain how loss to follow-up was addressed TBD

*Case-control study*—If applicable, explain how matching of cases and controls was addressed

*Cross-sectional study*—If applicable, describe analytical methods taking account of sampling strategy

(e) Describe any sensitivity analyses

## Results

|                         |     |                                                                                                                                                                                                                                                                                                                                                                                                               |
|-------------------------|-----|---------------------------------------------------------------------------------------------------------------------------------------------------------------------------------------------------------------------------------------------------------------------------------------------------------------------------------------------------------------------------------------------------------------|
| Participants<br>TBD     | 13* | (a) Report numbers of individuals at each stage of study—eg numbers potentially eligible, examined for eligibility, confirmed eligible, included in the study, completing follow-up, and analysed<br>(b) Give reasons for non-participation at each stage<br>(c) Consider use of a flow diagram                                                                                                               |
| Descriptive data<br>TBD | 14* | (a) Give characteristics of study participants (eg demographic, clinical, social) and information on exposures and potential confounders<br>(b) Indicate number of participants with missing data for each variable of interest<br>(c) <i>Cohort study</i> —Summarise follow-up time (eg, average and total amount)                                                                                           |
| Outcome data<br>TBD     | 15* | <i>Cohort study</i> —Report numbers of outcome events or summary measures over time<br><i>Case-control study</i> —Report numbers in each exposure category, or summary measures of exposure<br><i>Cross-sectional study</i> —Report numbers of outcome events or summary measures                                                                                                                             |
| Main results<br>TBD     | 16  | (a) Give unadjusted estimates and, if applicable, confounder-adjusted estimates and their precision (eg, 95% confidence interval). Make clear which confounders were adjusted for and why they were included<br>(b) Report category boundaries when continuous variables were categorized<br>(c) If relevant, consider translating estimates of relative risk into absolute risk for a meaningful time period |
| Other analyses<br>TBD   | 17  | Report other analyses done—eg analyses of subgroups and interactions, and sensitivity analyses                                                                                                                                                                                                                                                                                                                |

## Discussion

|                  |    |                                                                                                                                                                                |
|------------------|----|--------------------------------------------------------------------------------------------------------------------------------------------------------------------------------|
| Key results      | 18 | Summarise key results with reference to study objectives Found on p.13 Interpretation and conclusion                                                                           |
| Limitations      | 19 | Discuss limitations of the study, taking into account sources of potential bias or imprecision. Discuss both direction and magnitude of any potential bias TBD                 |
| Interpretation   | 20 | Give a cautious overall interpretation of results considering objectives, limitations, multiplicity of analyses, results from similar studies, and other relevant evidence TBD |
| Generalisability | 21 | Discuss the generalisability (external validity) of the study results objectives Found on p.13 Interpretation and conclusion                                                   |

## Other information

|         |    |                                                                                                                                                                            |
|---------|----|----------------------------------------------------------------------------------------------------------------------------------------------------------------------------|
| Funding | 22 | Give the source of funding and the role of the funders for the present study and, if applicable, for the original study on which the present article is based Found on p.2 |
|---------|----|----------------------------------------------------------------------------------------------------------------------------------------------------------------------------|

\*Give information separately for cases and controls in case-control studies and, if applicable, for exposed and unexposed groups in cohort and cross-sectional studies.

1  
2  
3  
4  
5  
6  
7  
8  
9  
10  
11  
12  
13  
14  
15  
16  
17  
18  
19  
20  
21  
22  
23  
24  
25  
26  
27  
28  
29  
30  
31  
32  
33  
34  
35  
36  
37  
38  
39  
40  
41  
42  
43  
44  
45  
46  
47  
48  
49  
50  
51  
52  
53  
54  
55  
56  
57  
58  
59  
60

**Note:** An Explanation and Elaboration article discusses each checklist item and gives methodological background and published examples of transparent reporting. The STROBE checklist is best used in conjunction with this article (freely available on the Web sites of PLoS Medicine at <http://www.plosmedicine.org/>, Annals of Internal Medicine at <http://www.annals.org/>, and Epidemiology at <http://www.epidem.com/>). Information on the STROBE Initiative is available at [www.strobe-statement.org](http://www.strobe-statement.org).

Confidential
